# Supplementary material
Source: Springer Nature journal article supplement (https://www.springermedizin.de/resource/supplementary/12985_2010_1027_MOESM1_ESM.pdf/9608980)
Supplement: MOESM1 [file 9608980]

Total 200 subjects positive by rapid HBsAg test were enrolled for this study

Out of total, 104 samples were HBsAg ELISA negative and were excluded from the study.

Total 96 samples were found reactive on HBsAg ELISA method and were further used for anti-HDV detection using ELISA

Total 16 samples were anti-HDV ELISA negative and were excluded from the study.

Total 80 samples were anti-HDV ELISA positive and were further analyzed by HDV PCR

Total 24 samples were found positive for HDV RNA by PCR

Total 56 anti-HDV ELISA positive samples were found negative for HDV RNA by PCR
